# Supplementary material
Source: HighWire-hosted journal article supplement (https://drc.bmj.com/content/10/1/e002517)

**Supplementary Table 1: Read/Med codes used to identify type 2 diabetes mellitus**

| MEDCODE | READ_CODE | DESCRIPTION                                   |
|---------|-----------|-----------------------------------------------|
| 17859   | C109.12   | Type 2 diabetes mellitus                      |
| 758     | C10F.00   | Type 2 diabetes mellitus                      |
| 18219   | C109.13   | Type 2 diabetes mellitus                      |
| 22884   | C10F.11   | Type 2 diabetes mellitus                      |
| 65704   | C109412   | Type 2 diabetes mellitus with ulcer           |
| 49074   | C10F400   | Type 2 diabetes mellitus with ulcer           |
| 55075   | C109411   | Type 2 diabetes mellitus with ulcer           |
| 91646   | C10F411   | Type 2 diabetes mellitus with ulcer           |
| 110611  | C10P111   | Type 2 diabetes mellitus in remission         |
| 46150   | C109512   | Type 2 diabetes mellitus with gangrene        |
| 12736   | C10F500   | Type 2 diabetes mellitus with gangrene        |
| 107824  | C10P100   | Type 2 diabetes mellitus in remission         |
| 45913   | C109712   | Type 2 diabetes mellitus - poor control       |
| 25627   | C10F700   | Type 2 diabetes mellitus - poor control       |
| 62107   | C109511   | Type 2 diabetes mellitus with gangrene        |
| 104323  | C10F511   | Type 2 diabetes mellitus with gangrene        |
| 24458   | C109711   | Type 2 diabetes mellitus - poor control       |
| 47315   | C10F711   | Type 2 diabetes mellitus - poor control       |
| 49869   | C109G12   | Type 2 diabetes mellitus with arthropathy     |
| 59253   | C10FG00   | Type 2 diabetes mellitus with arthropathy     |
| 24836   | C109C12   | Type 2 diabetes mellitus with nephropathy     |
| 12640   | C10FC00   | Type 2 diabetes mellitus with nephropathy     |
| 42762   | C109612   | Type 2 diabetes mellitus with retinopathy     |
| 18496   | C10F600   | Type 2 diabetes mellitus with retinopathy     |
| 32627   | C10FN00   | Type 2 diabetes mellitus with ketoacidosis    |
| 18143   | C109G11   | Type 2 diabetes mellitus with arthropathy     |
| 103902  | C10FG11   | Type 2 diabetes mellitus with arthropathy     |
| 64571   | C109C11   | Type 2 diabetes mellitus with nephropathy     |
| 102201  | C10FC11   | Type 2 diabetes mellitus with nephropathy     |
| 58604   | C109611   | Type 2 diabetes mellitus with retinopathy     |
| 49655   | C10F611   | Type 2 diabetes mellitus with retinopathy     |
| 63690   | C10FR00   | Type 2 diabetes mellitus with gastroparesis   |
| 106528  | C10FN11   | Type 2 diabetes mellitus with ketoacidosis    |
| 62674   | C10FA00   | Type 2 diabetes mellitus with mononeuropathy  |
| 109865  | C109B12   | Type 2 diabetes mellitus with polyneuropathy  |
| 18425   | C10FB00   | Type 2 diabetes mellitus with polyneuropathy  |
| 105784  | C109912   | Type 2 diabetes mellitus without complication |
| 47954   | C10F900   | Type 2 diabetes mellitus without complication |
| 50813   | C109A11   | Type 2 diabetes mellitus with mononeuropathy  |
| 95351   | C10FA11   | Type 2 diabetes mellitus with mononeuropathy  |

|        |         |                                                           |
|--------|---------|-----------------------------------------------------------|
| 47409  | C109B11 | Type 2 diabetes mellitus with polyneuropathy              |
| 50527  | C10FB11 | Type 2 diabetes mellitus with polyneuropathy              |
| 109103 | C109911 | Type 2 diabetes mellitus without complication             |
| 53392  | C10F911 | Type 2 diabetes mellitus without complication             |
| 44779  | C109E12 | Type 2 diabetes mellitus with diabetic cataract           |
| 44982  | C10FE00 | Type 2 diabetes mellitus with diabetic cataract           |
| 51756  | C10FP00 | Type 2 diabetes mellitus with ketoacidotic coma           |
| 61071  | C109D12 | Type 2 diabetes mellitus with hypoglycaemic coma          |
| 46917  | C10FD00 | Type 2 diabetes mellitus with hypoglycaemic coma          |
| 48192  | C109E11 | Type 2 diabetes mellitus with diabetic cataract           |
| 93727  | C10FE11 | Type 2 diabetes mellitus with diabetic cataract           |
| 106061 | C10FP11 | Type 2 diabetes mellitus with ketoacidotic coma           |
| 18209  | C109012 | Type 2 diabetes mellitus with renal complications         |
| 18777  | C10F000 | Type 2 diabetes mellitus with renal complications         |
| 56268  | C109D11 | Type 2 diabetes mellitus with hypoglycaemic coma          |
| 98723  | C10FD11 | Type 2 diabetes mellitus with hypoglycaemic coma          |
| 50225  | C109011 | Type 2 diabetes mellitus with renal complications         |
| 57278  | C10F011 | Type 2 diabetes mellitus with renal complications         |
| 25591  | C10FQ00 | Type 2 diabetes mellitus with exudative maculopathy       |
| 60699  | C109F12 | Type 2 diabetes mellitus with peripheral angiopathy       |
| 37806  | C10FF00 | Type 2 diabetes mellitus with peripheral angiopathy       |
| 108005 | C109312 | Type 2 diabetes mellitus with multiple complications      |
| 65267  | C10F300 | Type 2 diabetes mellitus with multiple complications      |
| 26054  | C10FL00 | Type 2 diabetes mellitus with persistent proteinuria      |
| 54899  | C109F11 | Type 2 diabetes mellitus with peripheral angiopathy       |
| 104639 | C10FF11 | Type 2 diabetes mellitus with peripheral angiopathy       |
| 66965  | C109H12 | Type 2 diabetes mellitus with neuropathic arthropathy     |
| 35385  | C10FH00 | Type 2 diabetes mellitus with neuropathic arthropathy     |
| 43227  | C10F311 | Type 2 diabetes mellitus with multiple complications      |
| 60796  | C10FL11 | Type 2 diabetes mellitus with persistent proteinuria      |
| 70316  | C109112 | Type 2 diabetes mellitus with ophthalmic complications    |
| 47321  | C10F100 | Type 2 diabetes mellitus with ophthalmic complications    |
| 47816  | C109H11 | Type 2 diabetes mellitus with neuropathic arthropathy     |
| 109197 | C10FH11 | Type 2 diabetes mellitus with neuropathic arthropathy     |
| 59725  | C109111 | Type 2 diabetes mellitus with ophthalmic complications    |
| 100964 | C10F111 | Type 2 diabetes mellitus with ophthalmic complications    |
| 45919  | C109212 | Type 2 diabetes mellitus with neurological complications  |
| 34268  | C10F200 | Type 2 diabetes mellitus with neurological complications  |
| 18390  | C10FM00 | Type 2 diabetes mellitus with persistent microalbuminuria |
| 67905  | C109211 | Type 2 diabetes mellitus with neurological complications  |
| 98616  | C10F211 | Type 2 diabetes mellitus with neurological complications  |
| 85991  | C10FM11 | Type 2 diabetes mellitus with persistent microalbuminuria |
| 111798 | C10FQ11 | Type 2 diabetes mellitus with exudative maculopathy       |

**Supplementary Figure 1: Study Design**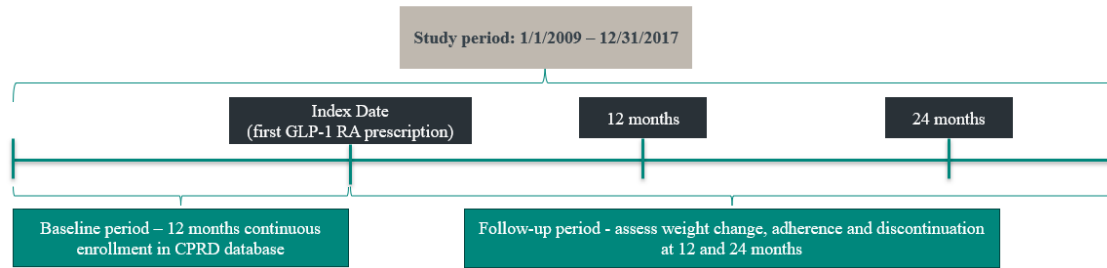

**Supplementary Figure 2. Study Cohort Flowchart**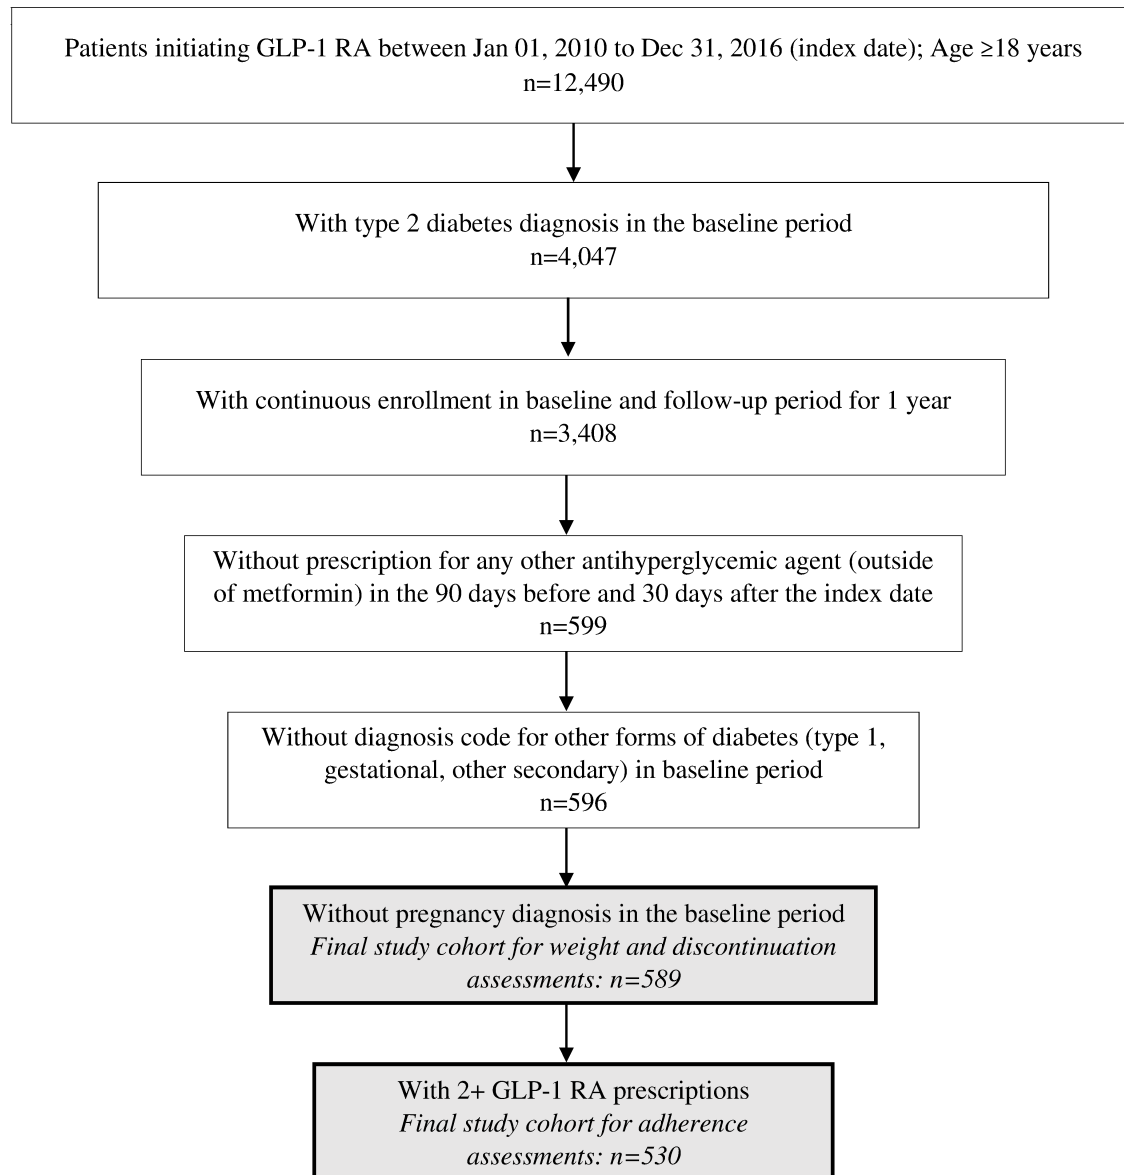

Supplement: inline-supplementary-material-1 [file inline-supplementary-material-1.pdf]
